# Supplementary material for: Proton-transfer supramolecular salts resulting from 3,5-dinitrobenzoic acid and aminomethyl pyridine
Source: Royal Society of Chemistry journal article supplement (doi:10.1039/c2nj40252a), 2012-01-01
Supplement: c2nj40252a.pdf [file c2nj40252a.pdf]

## *Supporting Information*

### **Proton-transfer Supramolecular Salts Resulted from 3,5-Dinitrobenzoic Acid and Aminomethyl Pyridine**

Xue-Hua Ding, Lin-Fang Cui, Yong-Hua Li,\* Shi Wang and Wei Huang\*

Key Laboratory for Organic Electronics & Information Displays (KLOEID),  
Institute of Advanced Materials (IAM), Nanjing University of Posts &  
Telecommunications,  
Nanjing 210046, China.

Fax: +86 25 85866396, +86 25 85866008

Tel: +86 25 85866396, +86 25 85866008

E-mail: iamyhli@njupt.edu.cn, wei-huang@njupt.edu.cn

**Table 1.** Crystallographic data for the complex of **1–3**

| Compounds      | <b>1</b>                                                      | <b>2</b>                                                      | <b>3</b>                                                       |
|----------------|---------------------------------------------------------------|---------------------------------------------------------------|----------------------------------------------------------------|
| Formula        | C <sub>13</sub> H <sub>12</sub> N <sub>4</sub> O <sub>6</sub> | C <sub>13</sub> H <sub>12</sub> N <sub>4</sub> O <sub>6</sub> | C <sub>26</sub> H <sub>24</sub> N <sub>8</sub> O <sub>12</sub> |
| Formula weight | 320.27                                                        | 320.27                                                        | 640.53                                                         |
| Crystal system | monoclinic                                                    | orthorhombic                                                  | triclinic                                                      |
| Space group    | <i>P</i> 2 <sub>1</sub> / <i>n</i>                            | <i>P</i> 2 <sub>1</sub> 2 <sub>1</sub> 2 <sub>1</sub>         | <i>P</i> -1                                                    |
| <i>a</i> (Å)   | 6.5494 (13)                                                   | 6.8770 (14)                                                   | 7.4234 (15)                                                    |
| <i>b</i> (Å)   | 9.1960 (18)                                                   | 9.2116 (18)                                                   | 11.738 (2)                                                     |
| <i>c</i> (Å)   | 23.512 (5)                                                    | 22.056 (4)                                                    | 17.698 (4)                                                     |

|                                        |                                                                      |                                                                      |                                                                      |
|----------------------------------------|----------------------------------------------------------------------|----------------------------------------------------------------------|----------------------------------------------------------------------|
| $\alpha$ (°)                           | 90°                                                                  | 90°                                                                  | 102.99 (3)°                                                          |
| $\beta$ (°)                            | 90.39 (3)°                                                           | 90°                                                                  | 100.52 (3)°                                                          |
| $\gamma$ (°)                           | 90°                                                                  | 90°                                                                  | 101.26 (3)°                                                          |
| $V$ (Å <sup>3</sup> )                  | 1416.0 (5)                                                           | 1397.2 (5)                                                           | 1431.8 (5)                                                           |
| $D_x$ (Mg m <sup>-3</sup> )            | 1.502                                                                | 1.522                                                                | 1.486                                                                |
| $\mu$ (mm <sup>-1</sup> )              | 0.12                                                                 | 0.12                                                                 | 0.12                                                                 |
| $Z$                                    | 4                                                                    | 4                                                                    | 2                                                                    |
| $T$ (K)                                | 293                                                                  | 293                                                                  | 293                                                                  |
| $F$ (000)                              | 664                                                                  | 664                                                                  | 664                                                                  |
| $\theta$ range for data collection (°) | 3.2–27.5                                                             | 3.1–27.5                                                             | 3.0–27.5                                                             |
| Index ranges                           | $-8 \leq h \leq 8,$<br>$-11 \leq k \leq 11,$<br>$-30 \leq l \leq 30$ | $-8 \leq h \leq 8,$<br>$-11 \leq k \leq 11,$<br>$-28 \leq l \leq 28$ | $-9 \leq h \leq 9,$<br>$-15 \leq k \leq 15,$<br>$-22 \leq l \leq 22$ |
| Measured reflections                   | 14201                                                                | 14505                                                                | 14831                                                                |
| Independent reflections                | 3246                                                                 | 3190                                                                 | 6511                                                                 |
| Data/restraints/parameters             | 3246/0/208                                                           | 3190/0/208                                                           | 6511/0/416                                                           |
| $R_{\text{int}}$                       | 0.045                                                                | 0.041                                                                | 0.063                                                                |
| Reflections with $I > 2\sigma(I)$      | 2348                                                                 | 2831                                                                 | 3674                                                                 |
| $R_1 [I > 2\sigma(I)]$                 | 0.055                                                                | 0.039                                                                | 0.062                                                                |
| $wR_2$ (all data)                      | 0.148                                                                | 0.092                                                                | 0.167                                                                |
| $S$                                    | 1.09                                                                 | 1.08                                                                 | 1.03                                                                 |

**Table 2.** Hydrogen Bond Distances and Parameters for the complex of **1–3** (Å, °)

| D–H...A                   | D–H  | H...A | D...A    | D–H...A |
|---------------------------|------|-------|----------|---------|
| Compound <b>1</b>         |      |       |          |         |
| N4–H4A...O2 <sup>i</sup>  | 0.89 | 1.93  | 2.810(2) | 172     |
| N4–H4B...O1 <sup>ii</sup> | 0.89 | 2.52  | 3.374(2) | 162     |
| N4–H4B...O2 <sup>ii</sup> | 0.89 | 2.15  | 2.908(2) | 142     |

|                            |      |      |          |     |
|----------------------------|------|------|----------|-----|
| N4–H4C···O1 <sup>iii</sup> | 0.89 | 1.93 | 2.776(2) | 157 |
| C9–H9A···O3 <sup>iv</sup>  | 0.93 | 2.57 | 3.149(3) | 121 |

Compound 2

|                             |      |      |            |     |
|-----------------------------|------|------|------------|-----|
| N4–H4A···O2 <sup>iv</sup>   | 0.89 | 1.98 | 2.7635(19) | 146 |
| N4–H4B···O1 <sup>v</sup>    | 0.89 | 1.93 | 2.8028(19) | 167 |
| N4–H4C···O1                 | 0.89 | 1.95 | 2.8323(19) | 170 |
| C13–H13B···O4 <sup>vi</sup> | 0.97 | 2.57 | 3.236(2)   | 126 |

Compound 3

|                               |      |      |       |     |
|-------------------------------|------|------|-------|-----|
| N6–H6A···N7 <sup>iv</sup>     | 0.89 | 2.02 | 2.900 | 171 |
| N6–H6B···O1                   | 0.89 | 1.80 | 2.668 | 166 |
| N6–H6C···O5 <sup>vii</sup>    | 0.89 | 2.59 | 3.080 | 116 |
| N6–H6C···N5 <sup>viii</sup>   | 0.89 | 2.51 | 3.139 | 129 |
| N8–H8C···O7 <sup>ix</sup>     | 0.89 | 2.48 | 2.973 | 115 |
| N8–H8C···O8 <sup>ix</sup>     | 0.89 | 2.04 | 2.921 | 169 |
| N8–H8A···O7                   | 0.89 | 1.88 | 2.750 | 167 |
| N8–H8B···O2                   | 0.89 | 1.95 | 2.757 | 151 |
| C15–H15A···O1 <sup>viii</sup> | 0.93 | 2.58 | 3.419 | 150 |
| C22–H22A···O11 <sup>x</sup>   | 0.93 | 2.55 | 3.282 | 136 |
| C26–H26B···O7 <sup>ix</sup>   | 0.97 | 2.57 | 3.168 | 120 |

---

Symmetry codes: (i)  $x-1, y+1, z$ ; (ii)  $-x+1, -y+1, -z$ ; (iii)  $x, y+1, z$ ; (iv)  $x-1, y, z$ ; (v)  $x-1/2, -y+3/2, -z+1$ ; (vi)  $-x, y-1/2, -z+3/2$ ; (vii)  $x-1, y-1, z$ ; (viii)  $-x+1, -y, -z+1$ ; (ix)  $-x, -y, -z$ ; (x)  $x, y-1, z$ .

**Table 3.** Summary of Mass (m/g) and Moles (n/mmol) Used of Acid and Amine for the Synthesis and Elemental analyses results of Compounds **1-3**

| Compound | Amine (m, n)                               | Acid (m, n)                                 | Elemental analyses results                                                                                                                               |
|----------|--------------------------------------------|---------------------------------------------|----------------------------------------------------------------------------------------------------------------------------------------------------------|
| <b>1</b> | 2-aminomethyl<br>pyridine<br>(0.029, 0.24) | 3,5-dinitrobenzoic<br>acid<br>(0.047, 0.22) | Anal. Calc. For C <sub>13</sub> H <sub>12</sub> N <sub>4</sub> O <sub>6</sub> :<br>C, 48.75; H, 3.78; N, 17.49. Found:<br>C, 48.90; H, 4.00; N, 17.27 %. |
| <b>2</b> | 3-aminomethyl<br>pyridine<br>(0.013, 0.11) | 3,5-dinitrobenzoic<br>acid<br>(0.025, 0.12) | Anal. Calc. For C <sub>13</sub> H <sub>12</sub> N <sub>4</sub> O <sub>6</sub> :<br>C, 48.75; H, 3.78; N, 17.49. Found:<br>C, 48.92; H, 3.88; N, 17.37 %. |
| <b>3</b> | 4-aminomethyl<br>pyridine<br>(0.038, 0.32) | 3,5-dinitrobenzoic<br>acid<br>(0.064, 0.30) | Anal. Calc. For C <sub>13</sub> H <sub>12</sub> N <sub>4</sub> O <sub>6</sub> :<br>C, 48.75; H, 3.78; N, 17.49. Found:<br>C, 48.60; H, 4.01; N, 17.40 %. |
